# Supplementary material
Source: PubMed Central journal article supplement (PMC1895590)
Supplement: blood_blood-2005-08-024976_1.pdf [file blood_blood-2005-08-024976_1.pdf]

|     | exp.1 |     |       |     | exp.2 |      |       |      | exp.3 |      |       |      |
|-----|-------|-----|-------|-----|-------|------|-------|------|-------|------|-------|------|
| day | day 3 |     | day 7 |     | day 3 |      | day 7 |      | day 3 |      | day 7 |      |
| MOI | LTR   | SIN | LTR   | SIN | LTR   | SIN  | LTR   | SIN  | LTR   | SIN  | LTR   | SIN  |
| 1   | 0.9   | 0.6 | 1.6   | 0.7 | 0.2   | 0.18 | 0.29  | 0.3  | 0.33  | 0.33 | 0.27  | 0.33 |
| 3   | 3.4   | 4.2 | 4.0   | 4.3 | 0.7   | 0.7  | 0.86  | 0.69 | 0.93  | 0.9  | 0.84  | 0.81 |
| 10  | 7.2   | 4.7 | 10.2  | 4.1 | 2.4   | 1.98 | 2.23  | 1.93 | 2.46  | 3.12 | 1.89  | 2.31 |
